# Supplementary material for: Prevalence, Incidence, and Recurrence of Febrile Seizures in Korean Children Based on National Registry Data
Source: PubMed Central journal article supplement — J Clin Neurol. 2017 Dec 27;14(1):43–7. doi: 10.3988/jcn.2018.14.1.43 (PMC5765255; doi:10.3988/jcn.2018.14.1.43), 2017-12-27
Supplement: jcn-14-43-s001.pdf [file jcn-14-43-s001.pdf]

**Supplementary Table 1.** Total population reported by the Korean Statistical Information Service and the population covered by the Korea National Health Insurance program during 2009–2013

| <b>Year</b> | <b>Population census</b> | <b>Covered by health insurance</b> |
|-------------|--------------------------|------------------------------------|
| 2009        | 2,276,742                | 2,267,624                          |
| 2010        | 2,281,200                | 2,303,728                          |
| 2011        | 2,313,461                | 2,334,943                          |
| 2012        | 2,324,347                | 2,326,574                          |
| 2013        | 2,310,731                | 2,308,323                          |
